# Supplementary material for: A Japanese version of the Perceived Stress Scale: cross-cultural translation and equivalence assessment
Source: BMC Psychiatry. 2008 Sep 30;8:85. doi: 10.1186/1471-244X-8-85 (PMC2569029; doi:10.1186/1471-244X-8-85)
Supplement: Additional file 2 — The Japanese version of the Perceived Stress Scale (PSS-J) [file 1471-244X-8-85-S2.pdf]

## 日本語版 Perceived Stress Scale

下の表は、人がどのように感じたり振るまったりするかという例を挙げたものです。  
それぞれの項目について、そのようなことが、この1ヶ月間にどのくらいあったかを印して下さい。  
全くなかった場合は「無」に、ほとんどなかった場合は「稀」に、ときどきあった場合は「時々」に、  
よくあった場合は「よく」に、何度もあった場合は「頻」に○をつけて下さい。

|                                                                        | 全くなし | ほとんど<br>なし | ときどき | よく<br>あった | 何度も<br>あった |
|------------------------------------------------------------------------|------|------------|------|-----------|------------|
| この1ヶ月間、思いがけない事が起きて<br>気が動転したことがどのくらいありましたか。                            | 無    | 稀          | 時々   | よく        | 頻          |
| この1ヶ月間、あなたの人生にとって重要な事柄を<br>自分でコントロールすることが出来なかったと<br>感じたことがどのくらいありましたか。 | 無    | 稀          | 時々   | よく        | 頻          |
| この1ヶ月間、神経質になっている、あるいは<br>ストレスがたまっていると感じたことが<br>どのくらいありましたか。            | 無    | 稀          | 時々   | よく        | 頻          |
| この1ヶ月間、イライラするような問題を<br>うまく処理したことがどのくらいありましたか。                          | 無    | 稀          | 時々   | よく        | 頻          |
| この1ヶ月間、生活の中で起きた大きな変化に<br>上手に適応していると感じたことがどのくらい<br>ありましたか。              | 無    | 稀          | 時々   | よく        | 頻          |
| この1ヶ月間、自分の個人的な問題を扱う能力に<br>自信を感じたことがどのくらいありましたか。                        | 無    | 稀          | 時々   | よく        | 頻          |
| この1ヶ月間、自分にとって良い方向に事が運んで<br>いると感じたことがどのくらいありましたか。                       | 無    | 稀          | 時々   | よく        | 頻          |
| この1ヶ月間、しなければならないことに全部は<br>うまく取り組めていないということが<br>どのくらいありましたか。            | 無    | 稀          | 時々   | よく        | 頻          |
| この1ヶ月間、生活の中のいら立たいしいことを<br>コントロールすることがどのくらい出来ましたか。                      | 無    | 稀          | 時々   | よく        | 頻          |
| この1ヶ月間、物事をうまく統制していると<br>感じたことがどのくらいありましたか。                             | 無    | 稀          | 時々   | よく        | 頻          |
| この1ヶ月間、あなたのコントロールのきかない<br>範囲で起きた事に対して怒りを感じたことが<br>どのくらいありましたか。         | 無    | 稀          | 時々   | よく        | 頻          |
| この1ヶ月間、ふと気がつくと、成しとげなければ<br>ならない事柄に考えをめぐらせていた、<br>ということがどのくらいありましたか。    | 無    | 稀          | 時々   | よく        | 頻          |
| この1ヶ月間、自分の時間の過ごし方を<br>どのくらい自分でコントロール出来ましたか。                            | 無    | 稀          | 時々   | よく        | 頻          |
| この1ヶ月間、大変な事があまりにも<br>積み重なってしまっていて、乗り越えることが出来ない<br>と感じたことが、どのくらいありましたか。 | 無    | 稀          | 時々   | よく        | 頻          |
